# Supplementary material
Source: PubMed Central journal article supplement (PMC3196824)
Supplement: NIHMS317883-supplement-Supp_Fig_S1___Table_S1-S3.pdf [file NIHMS317883-supplement-Supp_Fig_S1___Table_S1-S3.pdf]

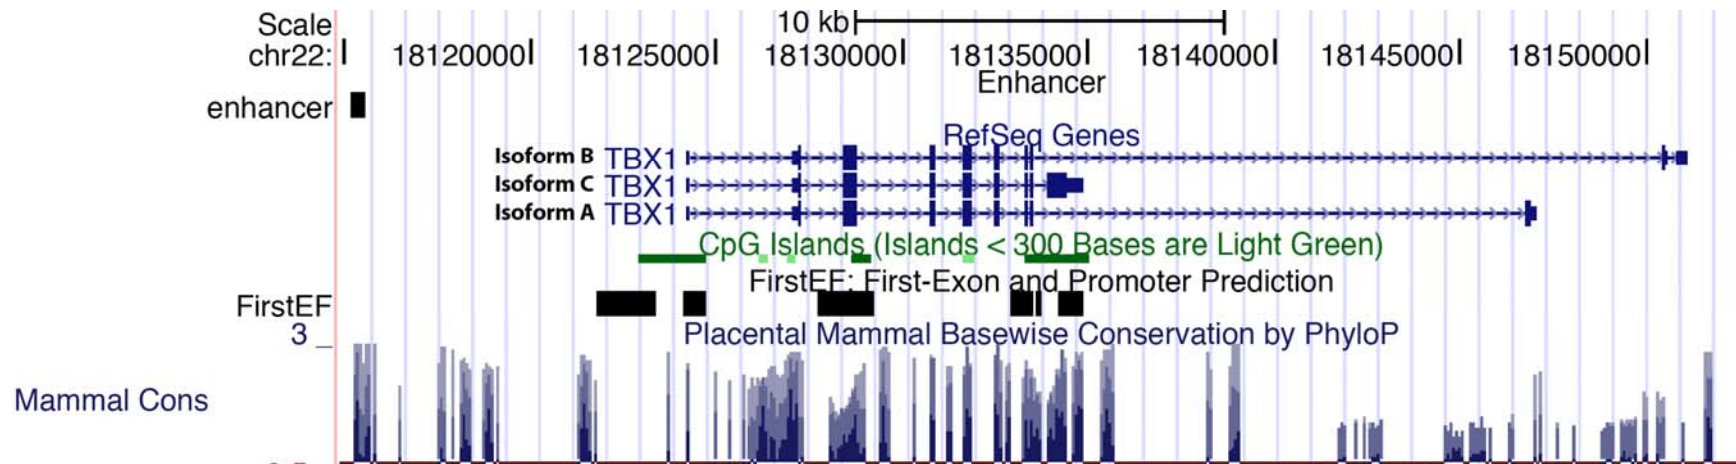

**Supp. Figure S1.** Gene structure of three isoforms of human *TBX1* gene. There are three isoforms of human *TBX1* protein, isoform A (NM\_080646, 18,124,226-18,147,068), B (NM\_005992, 18,124,226-18,151,112) and C (NM\_080647, 124,226-18,134,855). The enhancer track shows the human orthologous region to a previously defined enhancer for mouse *Tbx1* (18,115,184-18,115,529; Garg et al., 1999). Potential regulatory regions such as promoters have been associated with high CpG content referred to as CpG islands. First EF (First exon prediction) track shows the prediction of alternative start sites in the *TBX1* gene. CpG islands, which associated with potential regulatory regions such as promoters are shown in “CpG islands” track.

**Supp. Table S1. Primers used for *TBX1* resequencing**

| Amplicon ID                   | Amplicon Begin | Amplicon End | Amplicon Length | Forward Primer Sequence                    | Reverse Primer Sequence                    |
|-------------------------------|----------------|--------------|-----------------|--------------------------------------------|--------------------------------------------|
| R010_00000_1000_1109494573895 | 18109737       | 18110083     | 346             | TGTA AACGACG GCCAGT GAGGAGTCTGTG TCCGTGCC  | CAGGAAACAGCTATGACCACTCACCTGATGCCAGAGG      |
| R010_00100_1001_1109494573961 | 18116649       | 18116997     | 348             | TGTA AACGACG GCCAGT CAGACTCAGGGACACCTCC    | CAGGAAACAGCTATGACCCGATGAAGAAGGAGGCCGTT     |
| R010_00101_1002_1109494573964 | 18116895       | 18117211     | 316             | TGTA AACGACG GCCAGT AGGCAAGTCAAGGAGCAG     | CAGGAAACAGCTATGACCTAGGCAGTGGTTTGACGCC      |
| R010_00102_1003_1109494573967 | 18117053       | 18117391     | 338             | TGTA AACGACG GCCAGT CCTGGCAGGCAGGGAAGTA    | CAGGAAACAGCTATGACCCCTGCCCCCTCGTCGGA        |
| R010_00200_1004_1109494573970 | 18117191       | 18117541     | 350             | TGTA AACGACG GCCAGT GGCTGCAAAACCACTGCCT    | CAGGAAACAGCTATGACCCCATCCCACGAAAGTGCTTG     |
| R010_00201_1005_1109494573973 | 18117443       | 18117788     | 345             | TGTA AACGACG GCCAGT GCCTCCCAGGCTCGGGGT     | CAGGAAACAGCTATGACCCCTCGGGGTCTCGGGGAAG      |
| R010_00202_1006_1109494573976 | 18117687       | 18118022     | 335             | TGTA AACGACG GCCAGT AGCCGCCGCCCTTCTCT      | CAGGAAACAGCTATGACCCAGCATTGGTCCCAGGCTAC     |
| R010_00300_1007_1109494573979 | 18117732       | 18118082     | 350             | TGTA AACGACG GCCAGT GGGAGGGAGGACGGTGAG     | CAGGAAACAGCTATGACCCGGCAGACAGTATACCAGGATCTT |
| R010_00301_1008_1109494573982 | 18117951       | 18118301     | 350             | TGTA AACGACG GCCAGT CGTGCACTCGAACCTCC      | CAGGAAACAGCTATGACCCCGCTGGAGAATTGTGGC       |
| R010_00302_1009_1109494573985 | 18118205       | 18118544     | 339             | TGTA AACGACG GCCAGT TGAGGGTGCTGTCTGAA      | CAGGAAACAGCTATGACCAACCGAAGCTTGGCTCCAC      |
| R010_00400_1010_1109494573988 | 18118258       | 18118589     | 331             | TGTA AACGACG GCCAGT CGGAACTGGGCAGACAGAT    | CAGGAAACAGCTATGACCCGAGGGGGCAGATGGGA        |
| R010_00401_1011_1109494573991 | 18118477       | 18118817     | 340             | TGTA AACGACG GCCAGT CTCCTGCACTCAGCCAAGCC   | CAGGAAACAGCTATGACCCCGCCGCGGTTCCCTTC        |
| R010_00402_1012_1109494573994 | 18118711       | 18119061     | 350             | TGTA AACGACG GCCAGT CTCACCTCTGATCCACGC     | CAGGAAACAGCTATGACCCAGGATAGGGCTCCTCCGACC    |
| R010_00500_1013_1109494573997 | 18120572       | 18120885     | 313             | TGTA AACGACG GCCAGT CCAGGCAGAGCGCGGGCCT    | CAGGAAACAGCTATGACCTGCGCAGCCCGGAGCCCGA      |
| R010_00501_1014_1109494574000 | 18120700       | 18121049     | 349             | TGTA AACGACG GCCAGT ACATGTCTCGTCTCGG       | CAGGAAACAGCTATGACCCAGCTTGGGCTCTCGCAC       |
| R010_00600_1015_1109494574003 | 18121278       | 18121628     | 350             | TGTA AACGACG GCCAGT ATGTTCAAGGGCGTTGGTC    | CAGGAAACAGCTATGACCCAGAGAGGCGATGTGAAC       |
| R010_00601_1016_1109494574006 | 18121520       | 18121865     | 345             | TGTA AACGACG GCCAGT GGCTGGGCACACGCAATC     | CAGGAAACAGCTATGACCCGAGGCCACGCTACCAAGAG     |
| R010_00602_1017_1109494574009 | 18121757       | 18122103     | 346             | TGTA AACGACG GCCAGT AGCCTCCAGGCGGTCTA      | CAGGAAACAGCTATGACCTCGAGGCTTCTCTCTCTGTG     |
| R010_00700_1018_1109494574012 | 18122793       | 18123112     | 319             | TGTA AACGACG GCCAGT TCGGGCCGCCCTGCGGTGT    | CAGGAAACAGCTATGACCCGCGCGCACGGTCTGTAG       |
| R010_00701_1019_1109494574015 | 18122972       | 18123320     | 348             | TGTA AACGACG GCCAGT ACCTTGACGCTTCCACGG     | CAGGAAACAGCTATGACCCGTTGAACTCGTCCACAGC      |
| R010_00702_1020_1109494574018 | 18123147       | 18123490     | 343             | TGTA AACGACG GCCAGT GCACGCCCTACCCGTTTGC    | CAGGAAACAGCTATGACCCAGAGGGCCCGCAGGTG        |
| R010_00703_1021_1109494574021 | 18123385       | 18123735     | 350             | TGTA AACGACG GCCAGT CCTCCCACGTGCTGCCG      | CAGGAAACAGCTATGACCCGGTGAGGCCCTGGAC         |
| R010_00800_1022_1109494574024 | 18123853       | 18124181     | 328             | TGTA AACGACG GCCAGT GGATTACCCCTAAAACAGCGTG | CAGGAAACAGCTATGACCCGTTCTCAGAAAGGACGCC      |
| R010_00801_1023_1109494574027 | 18124034       | 18124380     | 346             | TGTA AACGACG GCCAGT TTGACCGTAGACAAGGGCG    | CAGGAAACAGCTATGACCCCCCAACCGAAGCTCT         |
| R010_00900_1024_1109494574030 | 18125138       | 18125480     | 342             | TGTA AACGACG GCCAGT TAGGGCCCTGCCAGATTAG    | CAGGAAACAGCTATGACCCGAGACCCGCCACTTCC        |
| R010_00901_1025_1109494574033 | 18125378       | 18125712     | 334             | TGTA AACGACG GCCAGT CTGCTCATGGACTTCGTGCC   | CAGGAAACAGCTATGACCGAAGAAGTCCGGGGCTGAGT     |
| R010_00000_1026_1109494573898 | 18126103       | 18126446     | 343             | TGTA AACGACG GCCAGT GGCAGCAGAGGGTTCAATCTC  | CAGGAAACAGCTATGACCCAGGCCCTGGGGGACACC       |
| R010_00001_1027_1109494573922 | 18126348       | 18126695     | 347             | TGTA AACGACG GCCAGT CGTGTCTTCGACAAGCTCA    | CAGGAAACAGCTATGACCAATCAGGAGTGGGGTGAGAGAA   |
| R010_00000_1028_1109494573901 | 18126910       | 18127240     | 330             | TGTA AACGACG GCCAGT GGGTTTTGCCAACTCATCC    | CAGGAAACAGCTATGACCCGTTTTCCAGAGCGTTGAA      |
| R010_00001_1029_1109494573925 | 18127104       | 18127454     | 350             | TGTA AACGACG GCCAGT GCGAGAAATATGCCAGGAGA   | CAGGAAACAGCTATGACCCGGAATGTTCCGAAAACAA      |
| R010_00000_1030_1109494573904 | 18127599       | 18127899     | 300             | TGTA AACGACG GCCAGT ACCTGGGGACACCAGAGAG    | CAGGAAACAGCTATGACCTCCTCAGGGTCACAGTCCC      |

| Amplicon ID                   | Amplicon Begin | Amplicon End | Amplicon Length | Forward Primer Sequence                   | Reverse Primer Sequence                     |
|-------------------------------|----------------|--------------|-----------------|-------------------------------------------|---------------------------------------------|
| R010_00001_1031_1109494573928 | 18127800       | 18128129     | 329             | TGTA AACGACGGCCAGTCTCCAGCGGCTTGCTCAC      | CAGGAAACAGCTATGACCCGGTAGAGCGCGCACAGGG       |
| R010_00002_1032_1109494573946 | 18128029       | 18128354     | 325             | TGTA AACGACGGCCAGTCTCGCGGAACCCCGTGGC      | CAGGAAACAGCTATGACCCGACCACTCGGTGCCAGC        |
| R010_00000_1033_1109494573907 | 18128318       | 18128653     | 335             | TGTA AACGACGGCCAGTACTTGGGGTCTCGGGCAC      | CAGGAAACAGCTATGACCCCTCGGGGTTCTGGGGGACT      |
| R010_00001_1034_1109494573931 | 18128545       | 18128848     | 303             | TGTA AACGACGGCCAGTCTGTGGCCCGGGTGCTA       | CAGGAAACAGCTATGACCCGCGGGGCTGGACTCAC         |
| R010_00000_1036_1109494573910 | 18128725       | 18129053     | 328             | TGTA AACGACGGCCAGTGACCACTATCTCGGGGCCAA    | CAGGAAACAGCTATGACCCCTGGGGCTGGGGGAAC         |
| R010_00002_1035_1109494573949 | 18128727       | 18129077     | 350             | TGTA AACGACGGCCAGTCCACTATCTCGGGGCCAA      | CAGGAAACAGCTATGACCCGGGAAGGGGAGAGCCGC        |
| R010_00001_1037_1109494573934 | 18128918       | 18129268     | 350             | TGTA AACGACGGCCAGTGTCTCTACGACTATTGCCCC    | CAGGAAACAGCTATGACCCGGTCTCGGGGAGAACAATA      |
| R010_00002_1038_1109494573952 | 18129154       | 18129497     | 343             | TGTA AACGACGGCCAGTAGCCACCGGGTCTCTTC       | CAGGAAACAGCTATGACCCGAGGCCCTGAGCTACCCC       |
| R010_00003_1039_1109494573958 | 18129375       | 18129717     | 342             | TGTA AACGACGGCCAGTGCGCCGACTTGATAAACGGT    | CAGGAAACAGCTATGACCATGCACACCTGGGCGGTA        |
| R010_00000_1040_1109494573913 | 18141158       | 18141498     | 340             | TGTA AACGACGGCCAGTTCGTGGGAGATGCAGTCTCT    | CAGGAAACAGCTATGACCCCGGCCCTCAGATTCAA         |
| R010_00000_0000_1109494573874 | 18141273       | 18141952     | 679             | TGTA AACGACGGCCAGTCAATTGGATGGGTTGTCACC    | CAGGAAACAGCTATGACCCGGCTTTTCCCGAGTGATGT      |
| R010_00001_1041_1109494573937 | 18141361       | 18141670     | 309             | TGTA AACGACGGCCAGTGTGGAGCTTCTGAGGGATGC    | CAGGAAACAGCTATGACCAACAAGTTTTGATTTATCAACTGGG |
| R010_00002_1042_1109494573955 | 18141509       | 18141843     | 334             | TGTA AACGACGGCCAGTTGGAGTTGTCTGTTCCCTT     | CAGGAAACAGCTATGACCGAACCAGTTTGAGGGAATCATCCT  |
| R010_00000_1043_1109494573916 | 18144851       | 18145200     | 349             | TGTA AACGACGGCCAGTGGGGCCTCAGCTGTCTGTGT    | CAGGAAACAGCTATGACCCGCTGGAGGATTGCTTCCAT      |
| R010_00001_1044_1109494573940 | 18145097       | 18145433     | 336             | TGTA AACGACGGCCAGTGAAGGTA CTGAGTTGGTGGTCC | CAGGAAACAGCTATGACCCCTCTTGCATGCACACTTGA      |
| R010_00000_1045_1109494573919 | 18146065       | 18146415     | 350             | TGTA AACGACGGCCAGTTGGGGACCGTGCAGCAG       | CAGGAAACAGCTATGACCAGCAGCCAGGACCCG           |
| R010_00001_1046_1109494573943 | 18146313       | 18146653     | 340             | TGTA AACGACGGCCAGTGGTGGGAAACACTGATTGAA    | CAGGAAACAGCTATGACCCGAGCACTACCCAGCGT         |

**Supp. Table S2. DNA variants identified from *TBX1* resequencing**

| Order | SNPs       | A1/A2 <sup>a</sup> | Position | MAF   | Function  | Table 2 <sup>b</sup> | Figure 4 <sup>c</sup> | Figure 6 <sup>d</sup> |
|-------|------------|--------------------|----------|-------|-----------|----------------------|-----------------------|-----------------------|
| 1     | rs41298611 | A/g                | 18122193 | 0.008 | promotor  |                      | 1                     | 1                     |
| 2     | rs41298613 | C/a                | 18122208 | 0.003 | promotor  |                      | 2                     | 2                     |
| 3     | rs72646935 | G/a                | 18122493 | 0.016 | promotor  |                      |                       | 3                     |
| 4     | rs41298615 | C/t                | 18122522 | 0.009 | promotor  |                      | 3                     | 4                     |
| 5     | rs72646936 | G/c                | 18122714 | 0.003 | promotor  |                      | 4                     | 5                     |
| 6     | rs41298621 | C/g                | 18122743 | 0.003 | promotor  |                      | 5                     | 6                     |
| 7     | rs41298623 | A/c                | 18122848 | 0.003 | promotor  |                      | 6                     | 7                     |
| 8     | rs41298627 | G/a                | 18123121 | 0.003 | promotor  |                      | 7                     | 8                     |
| 9     | rs72646937 | GAG/-              | 18123390 | 0.003 | promotor  |                      | 8                     | 9                     |
| 10    | rs41260844 | C/t                | 18123424 | 0.235 | promotor  | 1                    |                       |                       |
| 11    | rs41298629 | C/t                | 18123473 | 0.011 | promotor  |                      |                       | 10                    |
| 12    | rs41298631 | C/g                | 18123497 | 0.003 | promotor  |                      | 9                     | 11                    |
| 13    | rs41298635 | A/g                | 18123549 | 0.003 | promotor  |                      | 10                    | 12                    |
| 14    | rs5993823  | G/a                | 18123640 | 0.003 | promotor  |                      | 11                    | 13                    |
| 15    | rs72646938 | G/t                | 18124228 | 0.003 | promotor  |                      | 12                    | 14                    |
| 16    | rs72646939 | G/a                | 18126195 | 0.003 | intron    |                      | 13                    | 15                    |
| 17    | rs41299453 | G/a                | 18126338 | 0.003 | intron    |                      | 14                    | 16                    |
| 18    | rs41299455 | G/a                | 18126354 | 0.032 | intron    |                      |                       | 17                    |
| 19    | rs737867   | T/a                | 18126903 | 0.389 | intron    |                      |                       |                       |
| 20    | rs72646948 | C/g                | 18127033 | 0.006 | intron    |                      | 15                    | 18                    |
| 21    | rs41299457 | C/t                | 18127042 | 0.003 | intron    |                      | 16                    | 19                    |
| 22    | rs72646949 | G/a                | 18127051 | 0.003 | intron    |                      | 17                    | 20                    |
| 23    | rs737868   | C/g                | 18127082 | 0.383 | intron    | 2                    |                       |                       |
| 24    | rs72646950 | C/t                | 18127128 | 0.003 | intron    |                      | 18                    | 21                    |
| 25    | rs12158927 | G/c                | 18127485 | 0.006 | intron    |                      | 19                    | 22                    |
| 26    | rs41298790 | G/t                | 18127486 | 0.008 | intron    |                      | 20                    | 23                    |
| 27    | rs41298792 | G/a                | 18127487 | 0.008 | intron    |                      | 21                    | 24                    |
| 28    | rs72646951 | G/c                | 18128312 | 0.077 | intron    |                      |                       |                       |
| 29    | rs72646952 | G/t                | 18128468 | 0.011 | intron    |                      |                       | 25                    |
| 30    | rs72646953 | G/a                | 18128690 | 0.044 | Ala99Ala  |                      |                       | 26                    |
| 31    | rs72646954 | T/c                | 18128960 | 0.006 | intron    |                      | 22                    | 27                    |
| 32    | rs72646955 | C/g                | 18128967 | 0.003 | intron    |                      | 23                    | 28                    |
| 33    | Novel23    | -/tcgc             | 18129079 | 0.003 | intron    |                      | 24                    | 29                    |
| 34    | rs72646957 | T/c                | 18129375 | 0.003 | intron    |                      | 25                    | 30                    |
| 35    | rs41298798 | C/g                | 18129508 | 0.006 | intron    |                      | 26                    | 31                    |
| 36    | rs1978060  | G/a                | 18129525 | 0.309 | intron    |                      |                       |                       |
| 37    | rs41298802 | G/a                | 18129713 | 0.045 | intron    |                      |                       | 32                    |
| 38    | rs41298804 | G/t                | 18129725 | 0.006 | intron    |                      | 27                    | 33                    |
| 39    | rs72646958 | G/a                | 18130645 | 0.011 | intron    |                      |                       | 34                    |
| 40    | rs41298814 | T/c                | 18130773 | 0.176 | Phe140Phe | 3                    |                       |                       |
| 41    | rs72646959 | G/a                | 18130919 | 0.003 | intron    |                      | 28                    | 35                    |
| 42    | rs41298818 | C/t                | 18131065 | 0.014 | intron    | 4                    |                       | 36                    |
| 43    | rs72646960 | C/t                | 18131670 | 0.003 | intron    |                      | 29                    | 37                    |

|    |            |     |          |       |             |   |    |    |
|----|------------|-----|----------|-------|-------------|---|----|----|
| 44 | rs2301558  | C/t | 18131829 | 0.219 | Leu222Leu   | 5 |    |    |
| 45 | rs41298826 | T/c | 18132007 | 0.175 | intron      | 6 |    |    |
| 46 | rs72646961 | G/t | 18133186 | 0.003 | intron      |   | 30 | 38 |
| 47 | rs41298836 | C/t | 18133379 | 0.072 | intron      |   |    |    |
| 48 | rs41298838 | G/a | 18133444 | 0.003 | Gly310Ser   |   | 31 | 39 |
| 49 | rs41298840 | A/g | 18133449 | 0.177 | Ala311Ala   |   |    |    |
| 50 | rs72646963 | G/c | 18133608 | 0.003 | intron      |   | 32 | 40 |
| 51 | rs72646964 | C/g | 18133647 | 0.008 | intron      |   | 33 | 41 |
| 52 | rs72646965 | C/t | 18133829 | 0.006 | intron      |   | 34 | 42 |
| 53 | rs72646966 | A/g | 18133848 | 0.142 | intron      |   |    |    |
| 54 | rs13054377 | A/g | 18133961 | 0.072 | Ala353Ala   |   |    |    |
| 55 | rs72646967 | A/c | 18134091 | 0.181 | Asn397His   | 7 |    |    |
| 56 | rs72646968 | C/t | 18134303 | 0.003 | Ala467Ala   |   | 35 | 43 |
| 57 | rs72646969 | G/a | 18134508 | 0.014 | UTR         |   |    | 44 |
| 58 | rs72646970 | G/t | 18134725 | 0.006 | UTR         |   | 36 | 45 |
| 59 | rs72646971 | A/g | 18134791 | 0.003 | UTR         |   | 37 | 46 |
| 60 | rs72646972 | C/a | 18134817 | 0.003 | UTR         |   | 38 | 47 |
| 61 | rs4819522  | C/t | 18146782 | 0.156 | Thr350Met   |   |    |    |
| 62 | rs72646973 | C/t | 18146941 | 0.003 | UTR         |   | 39 | 48 |
| 63 | rs41298008 | C/g | 18146954 | 0.006 | UTR         |   | 40 | 49 |
| 64 | rs5746826  | G/t | 18147051 | 0.425 | intron      | 8 |    |    |
| 65 | rs72646974 | G/t | 18150562 | 0.003 | intron      |   | 41 | 50 |
| 66 | rs72646975 | C/t | 18150566 | 0.003 | intron      |   | 42 | 51 |
| 67 | rs41298850 | A/g | 18150706 | 0.003 | intron      |   | 43 | 52 |
| 68 | rs13055776 | C/t | 18150707 | 0.086 | intron      | 9 |    |    |
| 69 | rs2073762  | A/g | 18151568 | 0.436 | 3' flanking |   |    |    |
| 70 | rs72646976 | T/g | 18151743 | 0.006 | 3' flanking |   | 44 | 53 |
| 71 | rs72646977 | G/a | 18151854 | 0.006 | 3' flanking |   | 45 | 54 |

<sup>a</sup> A1 is the minor allele and A2 is the major allele. <sup>b</sup> "Table 2" are the common SNPs which were selected to be genotyped in the whole cohort of 1,022 subjects in Table 2. <sup>c</sup> "Figure 4" are the 45 very rare variations which were used for the rare variation enrichment analysis shown in Figure 4. <sup>d</sup> "Figure 6" are 54 rare variations which were used in Figure 6.

**Supp. Table S3. Association between representative common SNPs in *TBX1* and individual CHDs**

| Marker     | Location<br>(hg18) | A1/A2 | P value for individual CHDs |                 |      |      |      |      |      |
|------------|--------------------|-------|-----------------------------|-----------------|------|------|------|------|------|
|            |                    |       | ASD                         | Isolated<br>VSD | TOF  | PTA  | PS   | RAA  | IAAB |
| rs41260844 | 18123423           | T/C   | 0.39                        | 0.29            | 0.65 | 0.71 | 0.21 | 0.49 | 0.62 |
| rs737868   | 18127081           | G/C   | 0.09                        | 0.08            | 0.83 | 0.34 | 0.75 | 0.37 | 0.24 |
| rs41298814 | 18130772           | C/T   | 0.28                        | 0.20            | 0.99 | 0.65 | 0.81 | 0.86 | 0.67 |
| rs2301558  | 18131828           | T/C   | 0.17                        | 0.15            | 0.38 | 0.93 | 0.15 | 0.12 | 0.19 |
| rs41298826 | 18132006           | C/T   | 0.28                        | 0.37            | 0.67 | 0.41 | 0.72 | 0.77 | 0.75 |
| rs72646967 | 18134090           | C/A   | 0.34                        | 0.37            | 0.88 | 0.64 | 0.78 | 0.48 | 0.69 |
| rs4819522  | 18146781           | T/C   | 0.73                        | 0.47            | 0.70 | 0.58 | 0.20 | 0.58 | 0.41 |
| rs5746826  | 18147050           | T/G   | 0.12                        | 0.26            | 0.26 | 0.95 | 0.11 | 0.93 | 0.87 |
| rs13055776 | 18150706           | T/C   | 0.13                        | 0.28            | 0.11 | 0.39 | 0.31 | 0.62 | 0.65 |

#
